# Supplementary material
Source: MDPI journal article supplement (https://www.mdpi.com/2073-4395/14/1/187)
Supplement: s1 [file s1 › agronomy-2769462-supplementary.pdf]

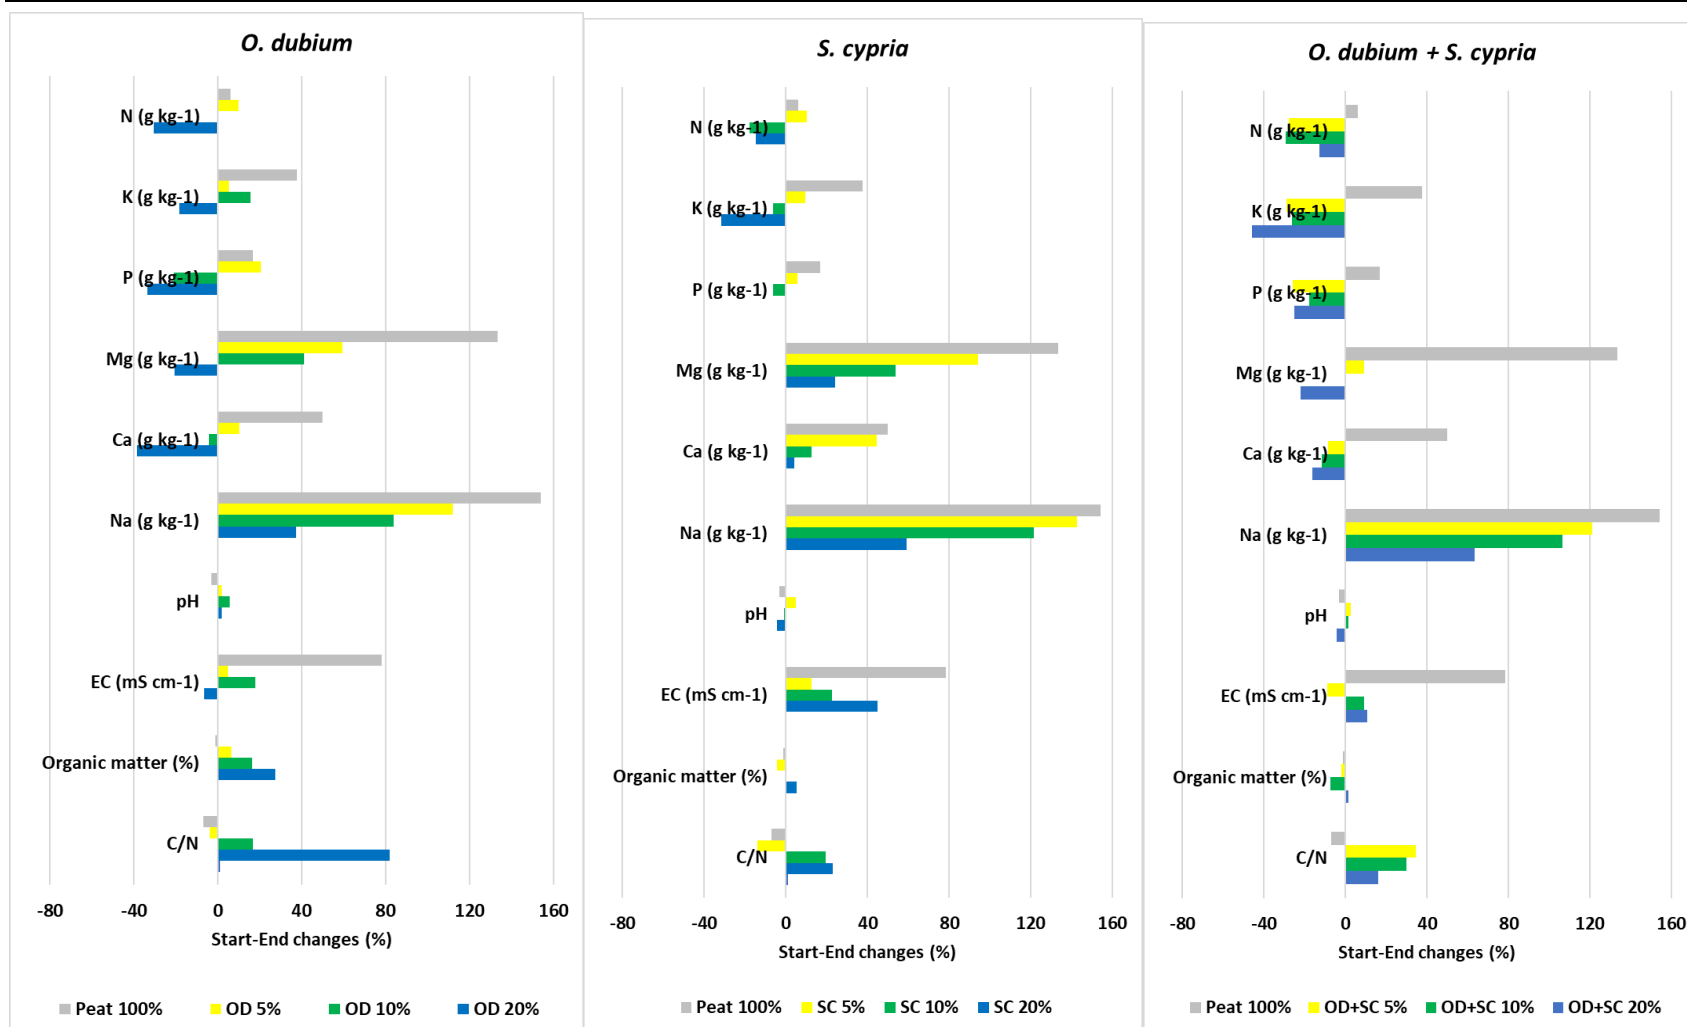

**Figure S1.** Changes of growing media (Peat, *O. dubium* residue -OD, *S. cypria* residue -SC and their mixtures) chemical properties (% of changes from initial to final material) after plant harvesting (at the end of the growing period).
